# Supplementary material for: Circulating cardio-enriched microRNAs are associated with long-term prognosis following myocardial infarction
Source: PubMed Central journal article supplement (PMC3598930; doi:10.1186/1471-2261-13-12), 2013-02-28
Supplement: 1471-2261-13-12-S1.pdf [file 1471-2261-13-12-S1.pdf]

**Supplemental Data, Gidlof et al, “Circulating cardio-enriched miRNAs are associated with long term prognosis following myocardial infarction”**

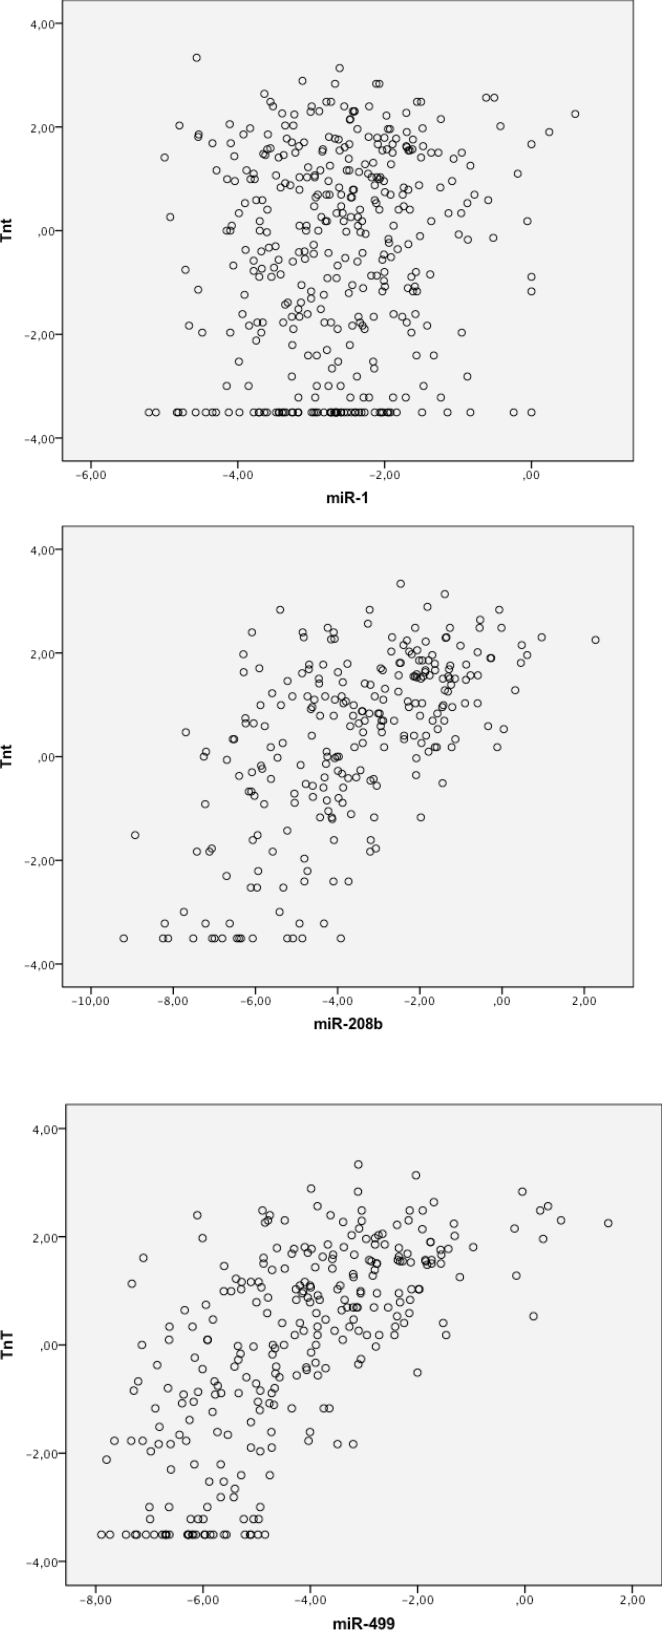

Supplemental Figure 1. Scatter plots for miRNAs and Troponin T.

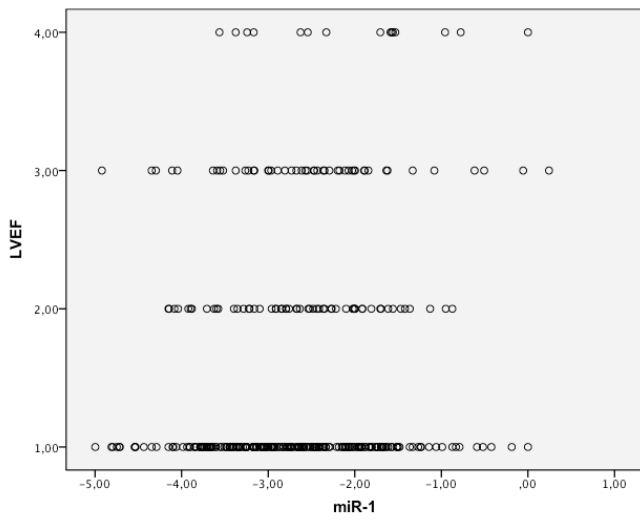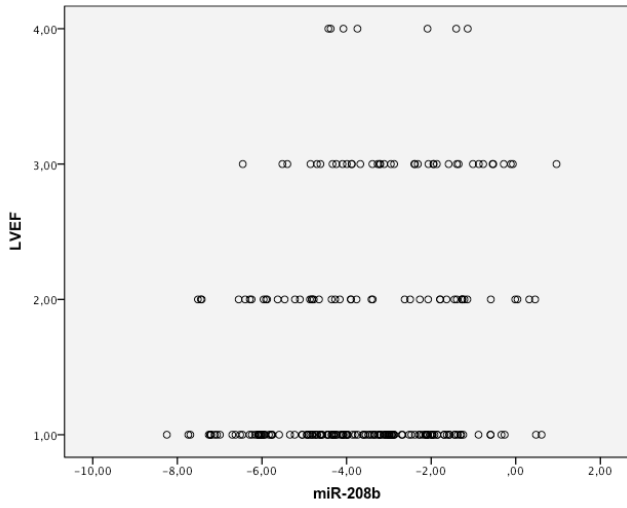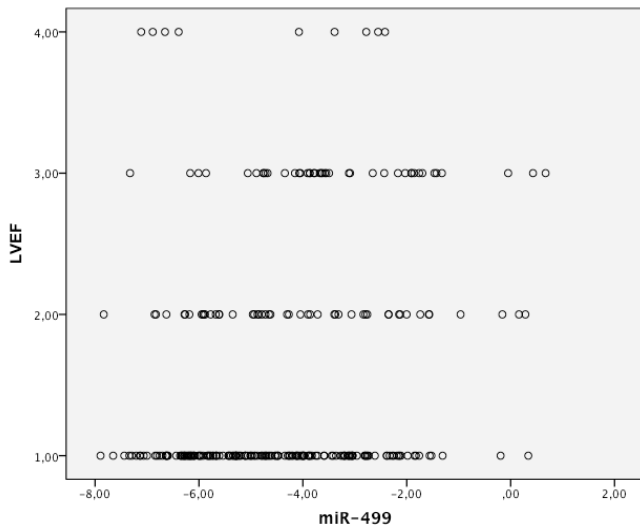

Supplemental Figure 2. Scatter plots for miRNAs and LVEF.
